# Supplementary material
Source: publisher figshare collection journal article supplement (https://acs.figshare.com/ndownloader/files/25298553)
Supplement: Supplementary file 1 [file 25298553]

## Supporting Information

**S224 presents a catalytic trade-off in PLP-dependent L-lanthionine synthase from**

***Fusobacterium nucleatum***

Robert G. Mothersole<sup>†</sup>, Cory R. Billett, Gurpreet Saini, Mina K. Mothersole, Amanda L. Darbyshire and Kirsten R. Wolthers<sup>†\*</sup>

<sup>†</sup>Department of Chemistry, The University of British Columbia, Okanagan Campus, 3247 University Way, Kelowna BC, V1V 1V7, CANADA

\*To whom correspondence should be addressed.

e-mail: [kirsten.wolthers@ubc.ca](mailto:kirsten.wolthers@ubc.ca)

Phone: 250-807-8663

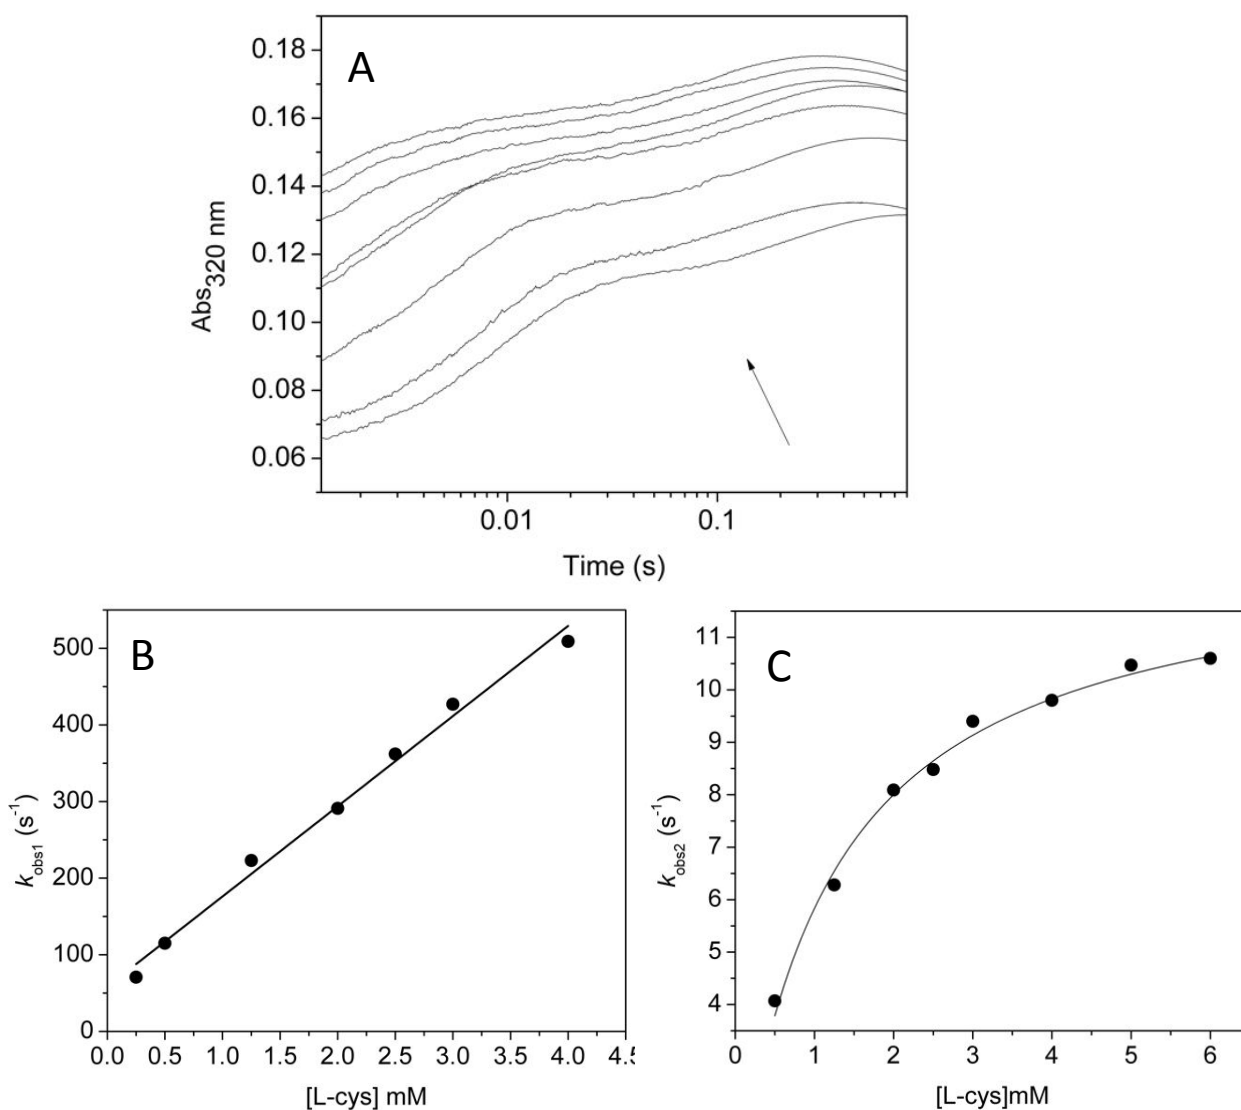

**Figure S1.** Reaction between 50  $\mu\text{M}$  wild type LS and L-cysteine (0.5 – 12 mM). (A) Biphasic absorbance traces collected at 320 nm at increasing concentrations of L-cysteine. The arrow denotes the direction of the absorbance traces at increasing concentrations of L-cysteine. (B) The linear dependence of  $k_{\text{obs1}}$  on L-cysteine concentration. The slope of the line gave bimolecular rate constants of  $118 \pm 5 \text{ mM}^{-1} \text{ s}^{-1}$ . (C) The hyperbolic dependence of  $k_{\text{obs2}}$  on L-cysteine

concentrations. A fit of equation 1 gave a  $K_d$  of  $1.2 \pm 0.1$  mM for L-cysteine and  $k_{lim}$  of  $12.8 \pm 0.3$  s<sup>-1</sup>.
